# Supplementary material
Source: publisher figshare collection journal article supplement (https://sage.figshare.com/ndownloader/files/30965209)
Supplement: Supplementary file 1 [file 30965209]

# SUPPLEMENTARY MATERIALS

*Note.* Participants were trained to refer to the autonomous agent as the AVO or “Air Vehicle Operator”. The term “pilot” is used throughout the associated paper for simplicity and consistency.

## Single-item trust questionnaire

| I trusted the AVO. | | | | |
| --- | --- | --- | --- | --- |
| 1  Strongly disagree | 2  Slightly disagree | 3  Neutral | 4  Slightly agree | 5  Agree |

## Multidimensional trust questionnaire based on Mayer and Gavin (2005)

| If I had my way, I would not let AVO have any influence over issues that are important to me.* | | | | |
| --- | --- | --- | --- | --- |
| 1  Strongly disagree | 2  Slightly disagree | 3  Neutral | 4  Slightly agree | 5  Agree |
| I would be willing to let AVO have complete control over my task in the team. | | | | |
| 1  Strongly disagree | 2  Slightly disagree | 3  Neutral | 4  Slightly agree | 5  Agree |
| I really wish I had a good way to keep an eye on the AVO.* | | | | |
| 1  Strongly disagree | 2  Slightly disagree | 3  Neutral | 4  Slightly agree | 5  Agree |
| I would tell the AVO about mistakes I have made on the team task, even if they could damage my reputation. | | | | |
| 1  Strongly disagree | 2  Slightly disagree | 3  Neutral | 4  Slightly agree | 5  Agree |
| I would share my opinion about sensitive issues with the AVO even if my opinion were unpopular. | | | | |
| 1  Strongly disagree | 2  Slightly disagree | 3  Neutral | 4  Slightly agree | 5  Agree |
| If the AVO asked why a problem happened, I would speak freely even if I were partly to blame. | | | | |
| 1  Strongly disagree | 2  Slightly disagree | 3  Neutral | 4  Slightly agree | 5  Agree |
| If someone questioned the AVOs motives, I would give the AVO the benefit of the doubt. | | | | |
| 1  Strongly disagree | 2  Slightly disagree | 3  Neutral | 4  Slightly agree | 5  Agree |
| If the AVO asked me for something, I respond without thinking about whether it might be held against me. | | | | |
| 1  Strongly disagree | 2  Slightly disagree | 3  Neutral | 4  Slightly agree | 5  Agree |

*Note.* * indicates question is reverse scored.
